# Supplementary material
Source: PubMed Central journal article supplement (PMC4817895)
Supplement: robm020243.ww1_default.pdf [file robm020243.ww1_default.pdf]

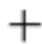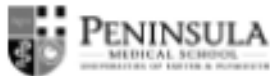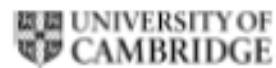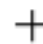

# SEEING THE DOCTOR

Please answer the questions below by putting an **X** in **ONE BOX** for each question unless more than one answer is allowed (these questions are clearly marked). We will keep your answers completely confidential.

## A. APPOINTMENTS AT YOUR GP SURGERY OR HEALTH CENTRE

**Q1** How do you normally book your appointments to see a doctor or nurse at this GP surgery or health centre?

Please **X all** the boxes that apply to you

|                                         |                                        |
|-----------------------------------------|----------------------------------------|
| <input type="checkbox"/> In person      | <input type="checkbox"/> Online        |
| <input type="checkbox"/> By phone       | <input type="checkbox"/> Digital TV    |
| <input type="checkbox"/> By fax machine | <input type="checkbox"/> Doesn't apply |

**Q2** Which of the following methods would you **prefer** to use to book appointments at this GP surgery or health centre?

Please **X all** the boxes that apply to you

|                                         |                                        |
|-----------------------------------------|----------------------------------------|
| <input type="checkbox"/> In person      | <input type="checkbox"/> Online        |
| <input type="checkbox"/> By phone       | <input type="checkbox"/> Digital TV    |
| <input type="checkbox"/> By fax machine | <input type="checkbox"/> No preference |

## B. GETTING THROUGH ON THE PHONE

Now please think about times you have phoned this GP surgery or health centre **in the past 6 months**.

**Q3** In the past 6 months, how easy have you found the following?

Please put an **X** in one box for **each** row

|                                         | Haven't tried            | Very easy                | Fairly easy              | Not very easy            | Not at all easy          | Don't know               |
|-----------------------------------------|--------------------------|--------------------------|--------------------------|--------------------------|--------------------------|--------------------------|
| Getting through on the phone .....      | <input type="checkbox"/> | <input type="checkbox"/> | <input type="checkbox"/> | <input type="checkbox"/> | <input type="checkbox"/> | <input type="checkbox"/> |
| Speaking to a doctor on the phone ..... | <input type="checkbox"/> | <input type="checkbox"/> | <input type="checkbox"/> | <input type="checkbox"/> | <input type="checkbox"/> | <input type="checkbox"/> |
| Speaking to a nurse on the phone .....  | <input type="checkbox"/> | <input type="checkbox"/> | <input type="checkbox"/> | <input type="checkbox"/> | <input type="checkbox"/> | <input type="checkbox"/> |
| Getting test results on the phone ..... | <input type="checkbox"/> | <input type="checkbox"/> | <input type="checkbox"/> | <input type="checkbox"/> | <input type="checkbox"/> | <input type="checkbox"/> |

## C. SEEING A DOCTOR

**Q4** In the past 6 months, have you **tried** to see a doctor fairly quickly?

By 'fairly quickly' we mean on the same day or in the next 2 weekdays the GP surgery or health centre was open.

Yes ..... Please go to Q5

No ..... Please go to Q7

Can't remember .... Please go to Q7

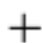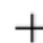

**Q5** Think about the last time you tried to see a doctor fairly quickly. Were you able to see a doctor on the same day or in the next 2 weekdays the GP surgery or health centre was open?

- Yes..... Please go to Q7
- No..... Please go to Q6
- Can't remember.... Please go to Q7

**Q6** If you couldn't be seen within the next 2 weekdays the GP surgery or health centre was open, why was that?

Please **X** all the boxes that apply to you

- There weren't any appointments
- The times offered didn't suit me
- The appointment was with a doctor I didn't want to see
- I could have seen a nurse but I wanted to see a doctor
- I was offered an appointment at a different branch of my surgery
- Another reason
- Can't remember

**Q7** In the past 6 months, have you tried to book ahead for an appointment with a doctor? By 'booking ahead' we mean booking an appointment more than 2 full weekdays in advance.

- Yes..... Please go to Q8
- No..... Please go to Q9
- Can't remember.... Please go to Q9

**Q8** Last time you tried to, were you able to get an appointment with a doctor more than 2 full weekdays in advance?

- Yes
- No
- Can't remember

## D. ARRIVING FOR YOUR APPOINTMENT

**Q9** How easy do you find it to get into the building at this GP surgery or health centre?

- Very easy
- Fairly easy
- Not very easy
- Not at all easy

**Q10** How clean is this GP surgery or health centre?

- Very clean
- Fairly clean
- Not very clean
- Not at all clean
- Don't know

**Q11** In the reception area, can other patients overhear what you say to the receptionist?

- Yes, but I don't mind
- Yes, and I am not happy about it
- No, other patients can't overhear
- Don't know

**Q12** How helpful do you find the receptionists at this GP surgery or health centre?

- Very helpful
- Fairly helpful
- Not very helpful
- Not at all helpful

**Q13** How long after your appointment time do you normally wait to be seen?

- I don't normally have appointments at a particular time
- I am normally seen at my appointment time
- Less than 5 minutes
- 5 to 15 minutes
- 16 to 30 minutes
- More than 30 minutes
- Can't remember

**Q14** How do you feel about how long you normally have to wait?

- I don't normally have to wait too long
- I have to wait a bit too long
- I have to wait far too long
- No opinion/doesn't apply

## E. SEEING THE DOCTOR YOU PREFER

**Q15** Is there a particular doctor you prefer to see at this GP surgery or health centre?

- Yes..... Please go to Q16
- No ..... Please go to Q18
- There is usually only one doctor in my GP surgery or health centre ..... Please go to Q18

**Q16** How often do you see the doctor you prefer to see?

- Always or almost always
- A lot of the time
- Some of the time
- Never or almost never
- Not tried at this GP surgery or health centre

**Q17** Was your consultation, which took place on the date referred to in the accompanying letter, with the doctor you prefer to see?

- Yes
- No

## F. OPENING HOURS

**Q18** How satisfied are you with the hours that this GP surgery or health centre is open?

- Very satisfied
- Fairly satisfied
- Neither satisfied nor dissatisfied
- Fairly dissatisfied
- Very dissatisfied
- I'm not sure when my GP surgery or health centre is open

Q19

As far as you know, is this GP surgery or health centre open...

Please put an 'X' in one box for each row

|                         | Yes                      | No                       | Sometimes                | Don't know               |
|-------------------------|--------------------------|--------------------------|--------------------------|--------------------------|
| ... before 6am? .....   | <input type="checkbox"/> | <input type="checkbox"/> | <input type="checkbox"/> | <input type="checkbox"/> |
| ... at lunchtime? ..... | <input type="checkbox"/> | <input type="checkbox"/> | <input type="checkbox"/> | <input type="checkbox"/> |
| ... after 6.30pm? ..... | <input type="checkbox"/> | <input type="checkbox"/> | <input type="checkbox"/> | <input type="checkbox"/> |
| ... on Saturdays? ..... | <input type="checkbox"/> | <input type="checkbox"/> | <input type="checkbox"/> | <input type="checkbox"/> |
| ... on Sundays? .....   | <input type="checkbox"/> | <input type="checkbox"/> | <input type="checkbox"/> | <input type="checkbox"/> |

Q20

Would you like this GP surgery or health centre to open at additional times?

- Yes ..... Please go to Q21  
 No ..... Please go to Section G

Q21

Which one of the following additional times would you most like this GP surgery or health centre to be open? Please pick one answer showing the time you would most like it to be open.

- Before 6am  
 At lunchtime  
 After 6.30pm  
 On a Saturday  
 On a Sunday

## G. SEEING A DOCTOR AT THE GP SURGERY OR HEALTH CENTRE

Thinking about the consultation, which took place on the date referred to in the letter accompanying this questionnaire...

Q22

How good was the doctor at each of the following?

Please put an 'X' in one box for each row

|                                                  | Very good                | Good                     | Neither good nor poor    | Poor                     | Very poor                | Doesn't apply            |
|--------------------------------------------------|--------------------------|--------------------------|--------------------------|--------------------------|--------------------------|--------------------------|
| Giving you enough time .....                     | <input type="checkbox"/> | <input type="checkbox"/> | <input type="checkbox"/> | <input type="checkbox"/> | <input type="checkbox"/> | <input type="checkbox"/> |
| Asking about your symptoms .....                 | <input type="checkbox"/> | <input type="checkbox"/> | <input type="checkbox"/> | <input type="checkbox"/> | <input type="checkbox"/> | <input type="checkbox"/> |
| Listening to you .....                           | <input type="checkbox"/> | <input type="checkbox"/> | <input type="checkbox"/> | <input type="checkbox"/> | <input type="checkbox"/> | <input type="checkbox"/> |
| Explaining tests and treatments .....            | <input type="checkbox"/> | <input type="checkbox"/> | <input type="checkbox"/> | <input type="checkbox"/> | <input type="checkbox"/> | <input type="checkbox"/> |
| Involving you in decisions about your care ..... | <input type="checkbox"/> | <input type="checkbox"/> | <input type="checkbox"/> | <input type="checkbox"/> | <input type="checkbox"/> | <input type="checkbox"/> |
| Treating you with care and concern .....         | <input type="checkbox"/> | <input type="checkbox"/> | <input type="checkbox"/> | <input type="checkbox"/> | <input type="checkbox"/> | <input type="checkbox"/> |
| Taking your problems seriously .....             | <input type="checkbox"/> | <input type="checkbox"/> | <input type="checkbox"/> | <input type="checkbox"/> | <input type="checkbox"/> | <input type="checkbox"/> |

Q23

Did you have confidence and trust in the doctor you saw?

- Yes, definitely  
 Yes, to some extent  
 No, not at all  
 Don't know/can't say

## H. YOUR OVERALL SATISFACTION

**Q24** In general, how satisfied are you with the care you get at this GP surgery or health centre?

- Very satisfied
- Fairly satisfied
- Neither satisfied nor dissatisfied
- Fairly dissatisfied
- Very dissatisfied

**Q25** Would you recommend this GP surgery or health centre to someone who has just moved to your local area?

- Yes, would definitely recommend
- Yes, might recommend
- Not sure
- No, would probably not recommend
- No, would definitely not recommend
- Don't know

## I. SOME QUESTIONS ABOUT YOU

The following questions will help us to see how experiences vary between different groups of the population. We will keep your answers completely confidential.

**Q26** Are you male or female?

- Male
- Female

**Q27** How old are you?

- Under 18
- 18 to 24
- 25 to 34
- 35 to 44
- 45 to 54
- 55 to 64
- 65 to 74
- 75 to 84
- 85 or over

**Q28** Which of these best describes what you are doing at present?

If more than one of these applies to you, please **X** the main ONE only

- Full-time paid work (30 hours or more each week) .....Please go to Q29
- Part-time paid work (under 30 hours each week) .....Please go to Q29
- Full-time education at school, college or university
- Unemployed
- Permanently sick or disabled
- Fully retired from work
- Looking after the home
- Doing something else

Please go to Q31

**Q29** In general, how long does your journey take from home to work (door to door)?

- Up to 30 minutes
- 31 minutes to 1 hour
- More than 1 hour
- I live on site

**Q30** If you need to see a doctor at your GP surgery or health centre during your typical working hours, can you take time away from your work to do this?

- Yes
- No

**Q31** In general, would you say your health is...?

- Excellent
- Very good
- Good
- Fair
- Poor

**Q32** Do you have any of the following long-standing conditions? Please include problems which are due to old age.

Please **X** all the boxes that apply to you

- Deafness or severe hearing impairment
- Blindness or severe visual impairment
- A condition that substantially limits one or more basic physical activities such as walking, climbing stairs, lifting or carrying
- A learning difficulty
- A long-standing psychological or emotional condition
- Other, including any long-standing illness
- No, I do not have a long-standing condition

**Q33** Are you a deaf person who uses sign language?

- Yes
- No

**Q34** Are you a parent or a legal guardian for any children aged under 16 currently living in your home?

- Yes
- No

**Q35** Do you have carer responsibilities for anyone in your household with a long-standing health problem or disability?

- Yes
- No

**Q36** What is your ethnic group?

Choose one section from A to E below, then select the appropriate option to indicate your ethnic group

**A. White**

- British
- Irish
- Any other White background

**B. Mixed**

- White and Black Caribbean
- White and Black African
- White and Asian
- Any other Mixed background

**C. Asian or Asian British**

- Indian
- Pakistani
- Bangladeshi
- Any other Asian background

**D. Black or Black British**

- Caribbean
- African
- Any other Black background

**E. Chinese or other ethnic group**

- Chinese
- Any other ethnic group

**Q37** Were you born in the UK?

- Yes
- No

**Q38** What language do you speak most often at home?

- English
- Other (please specify)

**THANK YOU FOR YOUR TIME**

Please return this questionnaire in the pre-paid envelope provided (no stamp is needed).

If for any reason you do not have a pre-paid envelope, please return the questionnaire using the freepost address below:

**Freepost RRJE-SLSG-RJSY  
Peninsula College of Medicine and Dentistry  
Primary Care Research Group  
Smeall Building, St Luke's Campus  
Magdalen Road  
Exeter  
EX1 2LU**

This questionnaire has been developed in conjunction with the Peninsula Medical School and the General Practice and Primary Care Research Unit at the University of Cambridge.

Your practice has asked that we collect any further comments you would like to make about the service they provide.

---

---

---

---

---

---

---

---

---

---
